# Supplementary material
Source: publisher site journal article supplement (http://www.degruyter.com/publication/journal_key/GEO/downloadAsset/GEO_Call%20for%20Papers%20Brochure.pdf)

# GLOBAL CIVIL ENGINEERING CONFERENCE

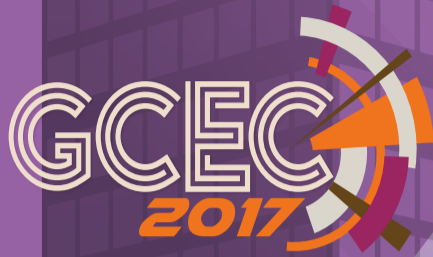

## STEERING GLOBAL SUSTAINABILITY THROUGH CIVIL ENGINEERING

25-28 JULY 2017 SERI PACIFIC HOTEL, KUALA LUMPUR, MALAYSIA

**APPROVED!**  
BEM CPD HOURS  
Workshop 5,  
Conference 12  
CIDB CCD HOURS  
Workshop 10,  
Conference 20

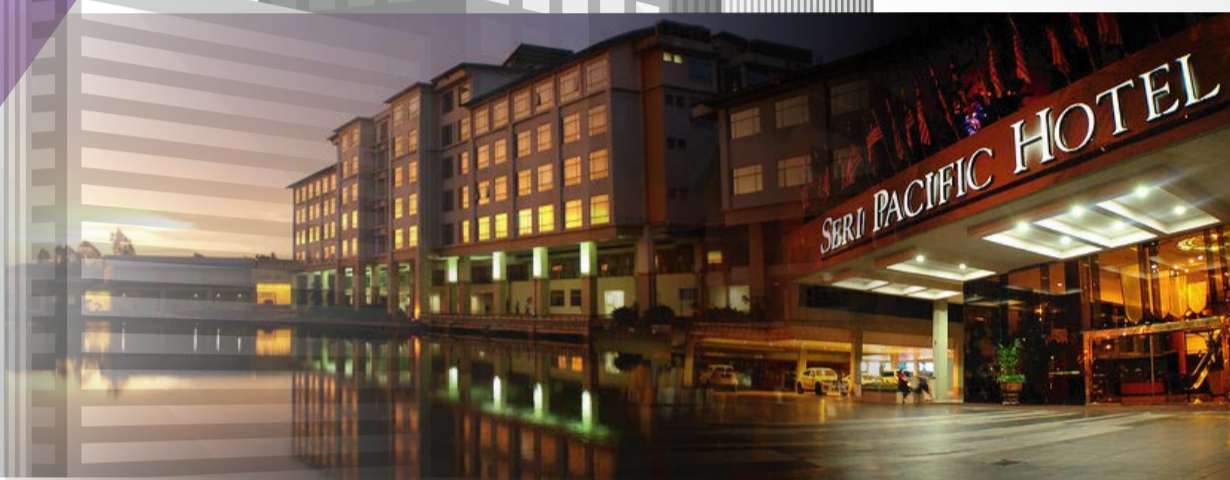

### KEYNOTE SPEAKERS

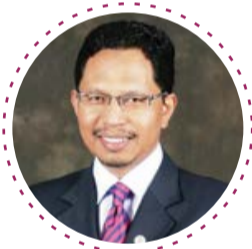

**DATO' SERI IR. DR. ZAINI BIN UJANG**  
Secretary General  
Ministry of Energy, Green Technology & Water  
(KeTTHA), MALAYSIA

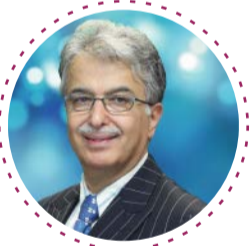

**PROF. DR. HOJJAT ADELI**  
Professor  
The Ohio State University, USA  
(Department of Civil, Environmental & Geodetic  
Engineering)

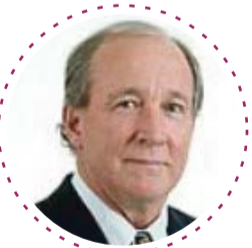

**PROF. DR. FRANK BULLEN**  
Professor  
The University of Southern Queensland,  
AUSTRALIA  
(School of Civil Engineering & Surveying)

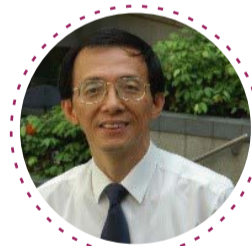

**PROF. DR. FWA TIEN FANG**  
Professor  
National University of Singapore, SINGAPORE  
(Department of Civil & Environmental  
Engineering)

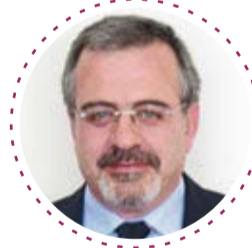

**PROF. DR. CANDAN GÖKÇEOĞLU**  
Professor  
Hacettepe Üniversitesi, TURKEY  
(Department of Geological Engineering)

**IMPORTANT DATES :**

- Early Bird Registration Deadline  
June 1, 2017
- Payment Deadline  
July 17, 2017

### REGISTRATION FEES

- ▶ **Early Bird Registration (Before June 1, 2017)**  
Local - RM 850                      International - USD 370
- ▶ **Late Registration (After June 1 - July 17, 2017)**  
Local - RM 1,010                      International - USD 425
- ▶ **Student**  
Local - RM 530                      International - USD 160
- ▶ **Workshop**  
Local - ~~RM 1,600~~ RM 950                      International - USD 425

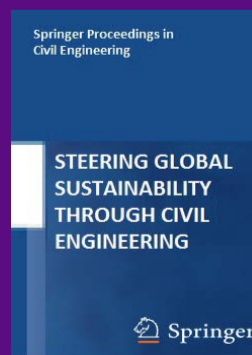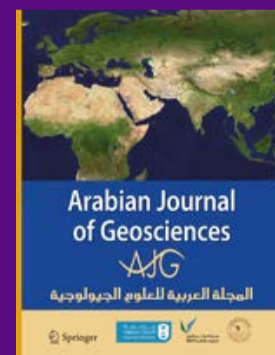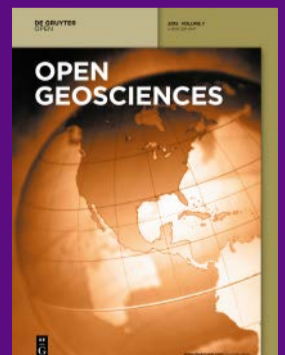

🌐 [www.gcec2017.upm.edu.my](http://www.gcec2017.upm.edu.my)      📍 Department of Civil Engineering, UPM  
✉ [gcec2017\\_infotech@upm.edu.my](mailto:gcec2017_infotech@upm.edu.my)

The conference is aimed at all engineers, academicians, researchers, managers, planners and policymakers working within the broad fields of Civil Engineering.

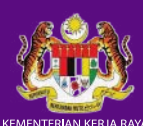

SUPPORTED BY:

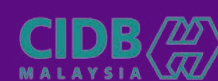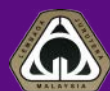

Supplement: Supplementary file 1 [file GEO_Call%20for%20Papers%20Brochure.pdf]
